# Supplementary material for: Glycoprotein Structural Genomics: Solving the Glycosylation Problem
Source: PubMed Central journal article supplement (PMC1885966; doi:10.1016/j.str.2007.01.011), 2007-03
Supplement: mmc1.pdf [file mmc1.pdf]

Structure 15

## Supplemental Data

### Glycoprotein Structural Genomics:

#### Solving the Glycosylation Problem

Veronica T. Chang, Max Crispin, A. Radu Aricescu, David J. Harvey, Joanne E. Nettleship, Janet A. Fennelly, Chao Yu, Kent S. Boles, Edward. J. Evans, David I. Stuart, Raymond A. Dwek, E. Yvonne Jones, Raymond J. Owens, and Simon J. Davis

## Supplemental Experimental Procedures

### Construction of Baculoviruses and Expression in *Sf9* Cells

Baculovirus expressing the RPTP $\mu$  extracellular region were constructed using the Bac-to-Bac<sup>®</sup> method according to the manufacturer's protocol. Primary virus stocks were amplified and used to infect 1 to 5L suspension cultures of *Sf9* cells in SF900II medium (InVitrogen Ltd, Paisley, UK) at a multiplicity of infection of approximately 5. Cultures (2 L) were grown in Erlenmeyer flasks at 37°C.

### Release of *N*-Linked Glycans by $\beta$ -Elimination

As insect cell-derived glycoproteins can potentially contain core  $\alpha$ 1–3 fucose, which prevents PNGase F cleavage, glycoproteins from the baculovirus expression system were released by  $\beta$ -elimination. Purified glycoproteins (50  $\mu$ g) from the baculovirus expression system were dried and dissolved in 1 mL of saturated ammonium carbonate solution in 29% ammonium hydroxide. After incubation at 60°C for 40 hrs, the reaction mixture was evaporated to dryness. The ammonium hydroxide and ammonium carbonate were removed by dissolving the sample in 1 mL water, evaporating to dryness. The dried sample was dissolved in 100  $\mu$ L of 0.5 M boric acid and incubated for 30 min at 37°C. The solution was evaporated to dryness and further boric acid was removed by two cycles of 1 mL methanol addition and evaporation. The sample was then dissolved in 100  $\mu$ L of water. An aliquot of the released glycans was derivatised with 2-aminobenzamide (2AB) according to Bigge *et al.* (1995), to facilitate HPLC analysis (data not shown).

**Supplemental Reference**

Bigge, J.C., Patel, T.P., Bruce, J.A., Goulding, P.N., Charles, S.M., and Parekh, R.B. (1995). Nonselective and efficient fluorescent labeling of glycans using 2-amino benzamide and anthranilic acid. *Anal. Biochem.* 230, 229-238.

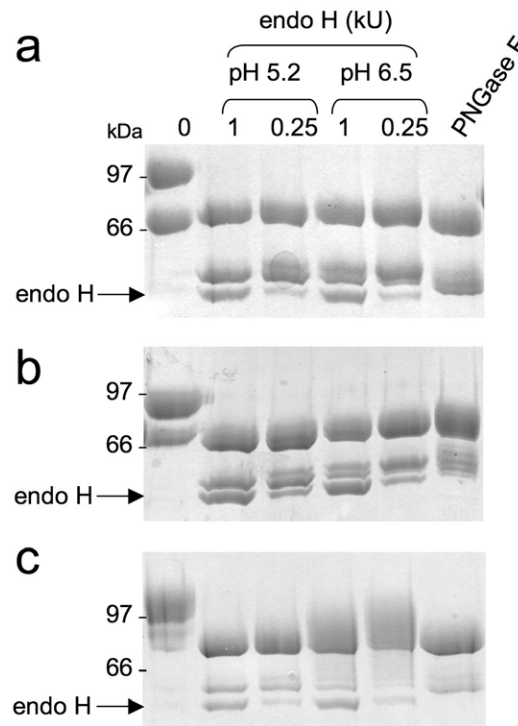

**Figure S1.** Endo H-Sensitivity of sRPTP $\mu$  Expressed in HEK 293 Cells

SDS-PAGE gels, run under reducing conditions, of endo H or PNGase F-treated sRPTP $\mu$  expressed in (A) GnTI-deficient HEK 293S cells, (B) HEK 293T cells cultured with 5  $\mu$ M kifunensine and (C) HEK 293T cells in the presence of 20  $\mu$ M swainsonine. In each case, 5  $\mu$ g of purified sRPTP $\mu$  was treated at 37°C with 1 kU or 0.25 kU of endo H at the indicated pH, or at 37°C with 0.5 kU of PNGase F at pH 7.4, for 6 h. The multiple bands present in the sRPTP $\mu$  samples are common to the PTP family and arise from proteolytic ‘nicking’. The larger, un-nicked fragment, when deglycosylated, is approximately the same size as the glycosylated nicked fragments.

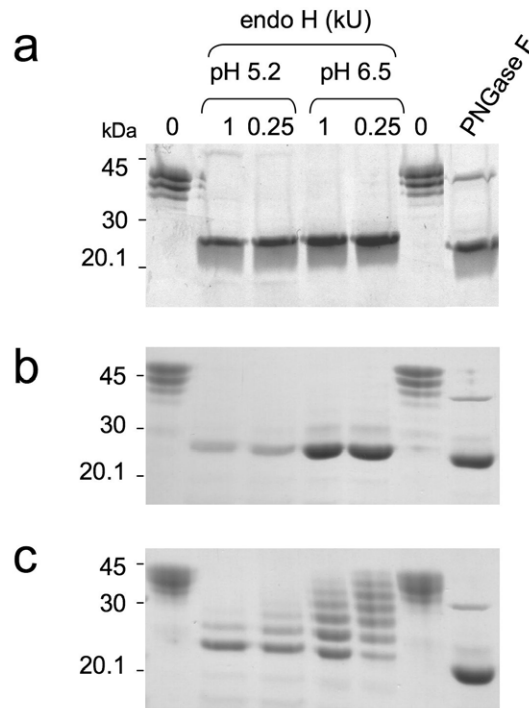

**Figure S2.** Endo H-Sensitivity of sCD48 Expressed in HEK 293 Cells

SDS-PAGE gels, run under reducing conditions, of endo H or PNGase F-treated CD48 expressed in (A) GnTI-deficient HEK 293S cells, (B) HEK 293T cells grown in 5  $\mu$ M kifunensine and (C) HEK 293T cells in the presence of 20  $\mu$ M swainsonine. In each case, 5  $\mu$ g of purified sCD48 was treated at 37°C with 1 kU or 0.25 kU of endo H at the indicated pH, or at 37°C with 0.5 kU of PNGase F at pH 7.4, for 6 h.

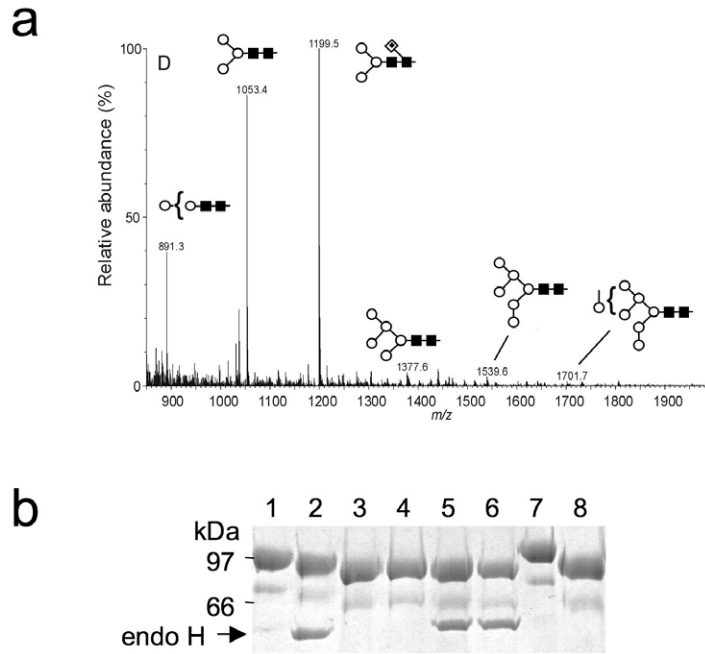

**Figure S3.** Deglycosylation of sRPTP $\mu$  Expressed in the Baculovirus System

(A) MALDI-TOF MS spectra of glycans released by  $\beta$ -elimination and derivatized with 2-aminobenzamide, and (B) SDS-PAGE gel showing the sensitivity of the protein to endoglycosidase digestion. Deglycosylation of 20  $\mu$ g of undenatured sRPTP $\mu$  expressed in *Sf9* insect cells was carried out with the following enzymes for 6 h: *lane 1*, undigested; *lane 2*, 1 kU of endo H at pH 6.5; *lane 3*, 6 mU of endo D at pH 6.5; *lane 4*, 4 mU of Endo F<sub>3</sub> at pH 5.2; *lane 5*, endo H and endo D; *lane 6*, endo H and endo F<sub>3</sub>; *lane 7*, undigested. For comparison, denatured sRPTP $\mu$  was also digested with 0.5 kU of PNGase F at pH 7.4 (*lane 8*).
